# Supplementary material for: Cardiovascular Health Does Not Change Following High-Intensity Interval Training in Women with Polycystic Ovary Syndrome
Source: MDPI journal article supplement (doi:10.3390/jcm11061626), 2022-03-15
Supplement: s1 [file s1]

## CONSORT 2010 Flow Diagram

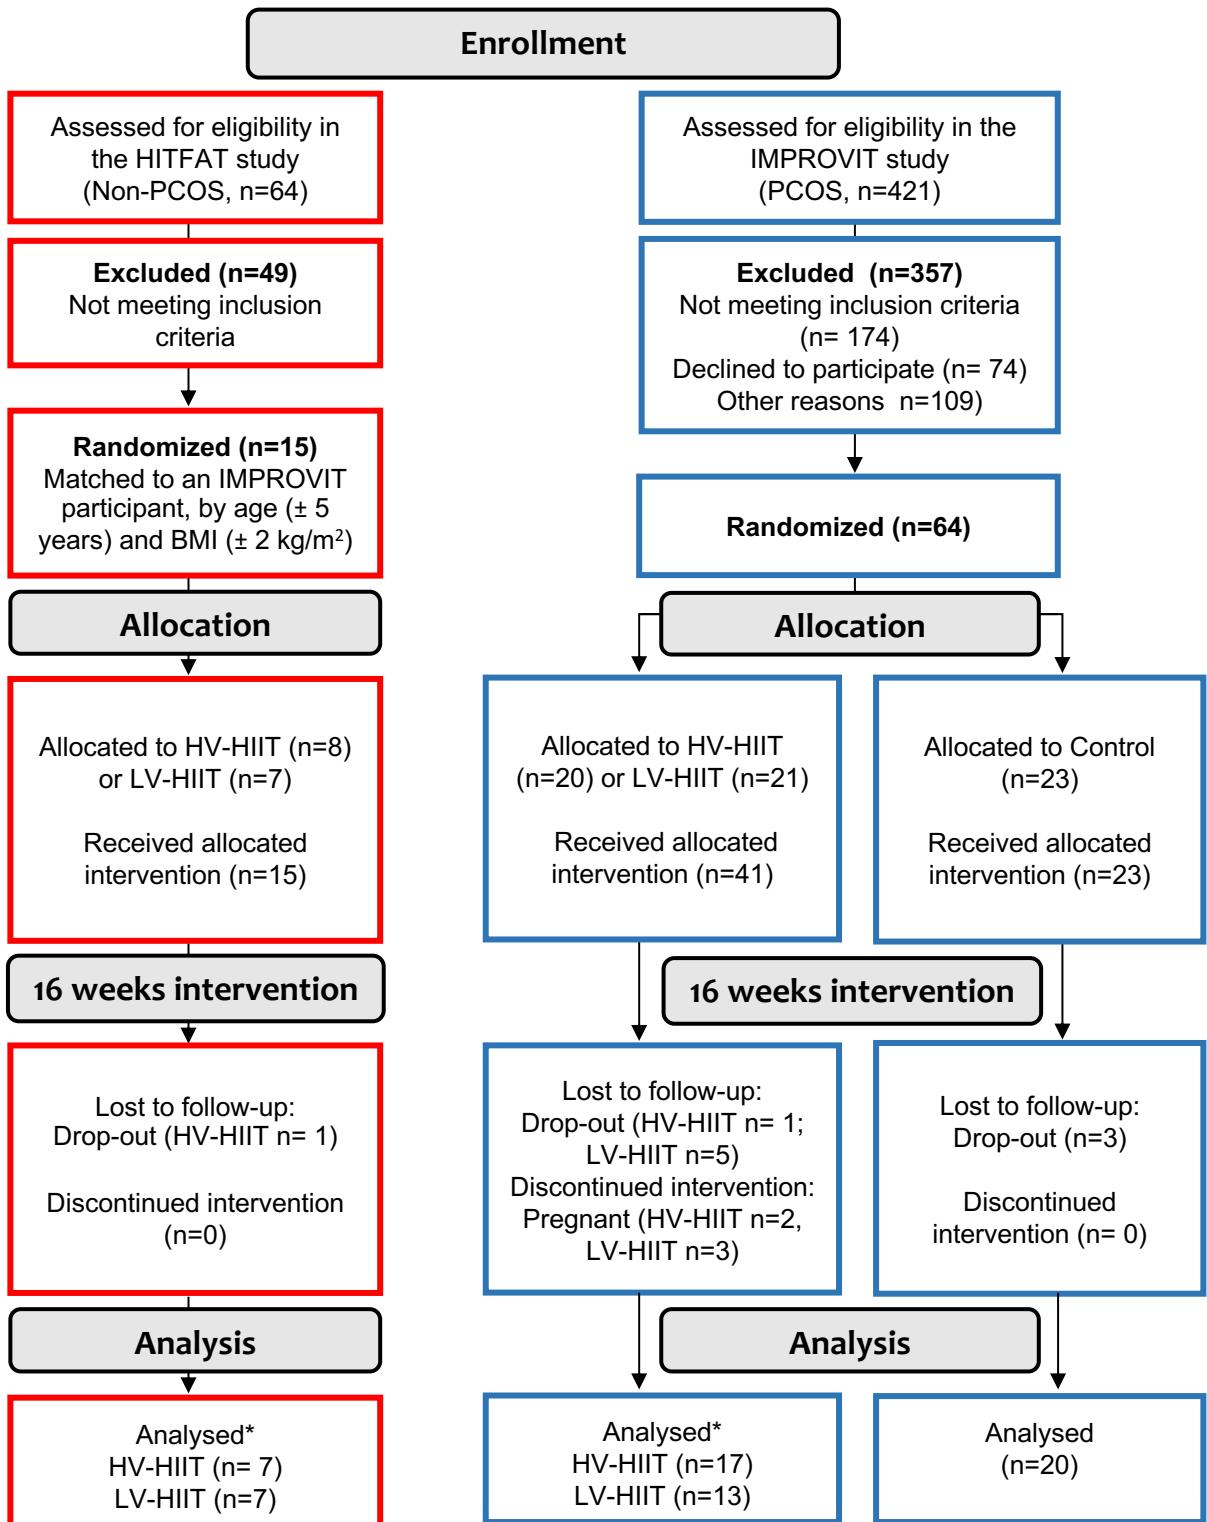

\* Low-volume high-intensity interval training (LV-HIIT) and high-volume high-intensity interval training (HV-HIIT) were pooled in the analysis for both women with and without PCOS to improve statistical power.

**Figure S1:** Participant CONSORT flow diagram.
